# Supplementary material for: Evaluation of leaf-level optical properties employed in land surface models
Source: Copernicus journal article supplement (doi:10.5194/gmd-12-3923-2019), 2019-09-05
Supplement: Supplementary file 2 [file gmd-12-3923-2019-supplement.zip]

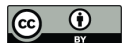

## *Supplement of*

# **Evaluation of leaf-level optical properties employed in land surface models**

**Titta Majasalmi and Ryan M. Bright**

*Correspondence to:* Titta Majasalmi ([titta.majasalmi@nibio.no](mailto:titta.majasalmi@nibio.no))

- [gmd-12-3923-2019-supplement-title-page.pdf](#)
- Supplements
  - [S1\\_CLM5.pdf](#)
  - [S2\\_OP.csv](#)
  - [S3\\_LIA.csv](#)
  - [post\\_processing\\_2019\\_gmd59.txt](#)

The copyright of individual parts of the supplement might differ from the CC BY 4.0 License.
